# Supplementary material for: Derivatives of Betulin and Betulinic Acid Containing a Phosphonate Group—In Silico Studies and Preliminary In Vitro Assessment of Antiviral Activity
Source: MDPI journal article supplement (doi:10.3390/app14041452), 2024-02-09
Supplement: s1 [file s1]

Archive with 1 entries (1 files):
- applsci-2801207-supplementary.pdf
