# Supplementary material for: Derivatives of Betulin and Betulinic Acid Containing a Phosphonate Group—In Silico Studies and Preliminary In Vitro Assessment of Antiviral Activity
Source: MDPI journal article supplement (doi:10.3390/app14041452), 2024-02-09
Supplement: s1 [file s1 › applsci-2801207-supplementary.pdf]

## Supplementary Materials

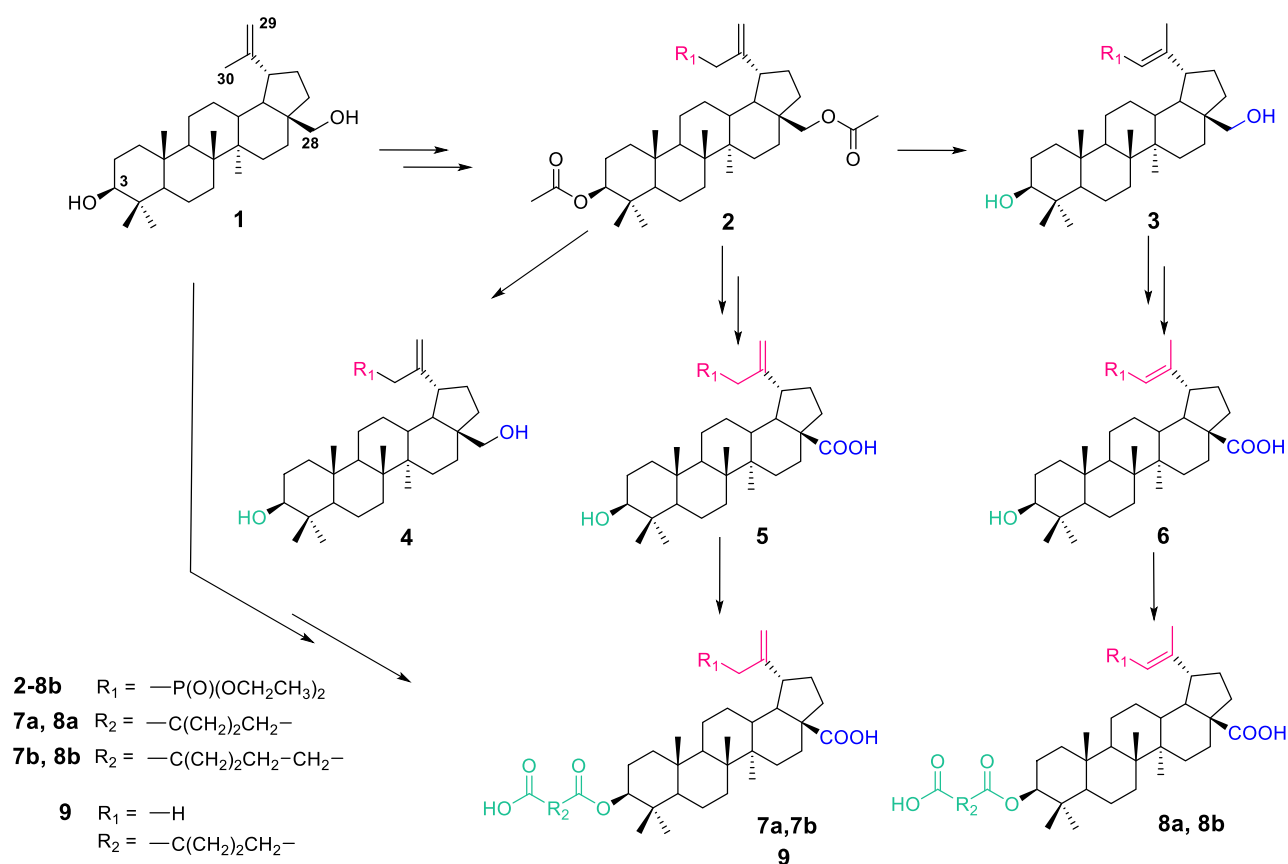

**Figure S1. Scheme of the synthesis of the tested compounds 2-9.**

### S1 Procedure for the synthesis of compounds 2-9.

The 3,28-diacetylbetulin obtained from betulin **1** was brominated in the allyl position with N-bromosuccinimide. From the formed 30-bromo-3,28-diacetylbetulin, in the reaction with triethyl phosphite, the 30-phosphonate derivative of 3,28-diacetylbetulin **2** was obtained. Then, the hydrolysis of the acetyl groups in the compound **2** under the influence of potassium hydroxide in boiling ethanol was carried out. The reaction conditions used led to allyl-vinyl isomerization in the isopropenyl group, resulting in the formation of 29-diethoxy-phosphonylbetulin **3**. To obtain a series of derivatives containing a phosphonate group at position C30, milder hydrolysis conditions were used, which led to the formation of compound **4**. The yield of this reaction was not satisfactory and therefore, derivative **5** was synthesized in a different reaction sequence running through the stage of the 30-phosphonate

derivative of 3-acetylbetulin [37]. In the last stage, acylation reactions of compounds **5** and **6** with acid anhydrides (dimethylsuccinyl and 2,2-dimethylglutaryl) were carried out in a microwave reactor, obtaining derivatives **7a**, **7b**, **8a**, **8b**. Oxidation of betulin **1** with Jones reagent followed by reduction with sodium borohydride yielded betulinic acid, which was converted to 3-O-(3',3'-dimethylsuccinyl) betulinic acid **9** (bevirimat, BVM).

## S2 Methodology of *in silico* studies

### S2.1. Assessment of ADME Properties and Drug-likeness of the Screened Molecules

The structures of the tested compounds **1**, **3-9** were converted to SMILES codes using the ChemDraw application and sent for analysis in pkCSM (<http://biosig.unimelb.edu.au/pkcsml/prediction> accessed on 22 January 2023) and SwissADME (<http://www.swissadme.ch/index.php> accessed on 22 January 2023).

ADMET parameters were predicted using pkCSM software [45]. Calculations of physicochemical parameters and assessment of drug similarity were carried out using the SwissADME platform [46].

### S2.2. Calculations of Quantum Descriptors

The optimized chemistry structure of compound **3** was calculated using the DFT (B3LYP/6-311G+(d,p)) method implemented in the Gaussian 16 program package [47]. The calculated geometry was used to determine the HOMO-LUMO energy, quantum chemical descriptor, the molecular electrostatic potential, and the molecular docking study [48]. All obtained results were visualized in the GaussView, Version 5 software package [49].

### S2.3. Method for Molecular Docking

Low-energy conformations of the studied compounds were obtained using the General Atomic and Molecular Electronic Structure System computer program (ver. 30SEP2019(R2), GAMESS, <https://www.msg.chem.iastate.edu/gamess/>). Density functional at the B3LYP/6e31p(g,d,p) level of theory was used. The macromolecular structure of HadV-5 virus protease [50], which was used as the target protein, was obtained from the Protein Data Bank (<https://www.rcsb.org/>, PDB ID: 4PIE). The AutoLigand extension in AutoDockTools was used to search for the ligand-binding site in the protein [51]. All input files were prepared using AutoDockTools (ver. 1.5.6). Docking poses were obtained and ranked by their score values in kcal/mol. The BIOVIA Discovery Studio package and LigPlot+ software were used to analyze and visualize the results [52, 53]. AutoDock Vina software (ver. 1.1.2) was used to perform molecular docking [54].
